# Supplementary material
Source: ML conference proceedings conference paper supplement (https://openreview.net/forum?id=pdjkikvCch)
Supplement: supplementary_material [file attachment]

## **Random-Set Neural Networks**

Link to code:

[https://anonymous.4open.science/r/Random\\_Set\\_Neural\\_Networks-2E12/README.md](https://anonymous.4open.science/r/Random_Set_Neural_Networks-2E12/README.md)
